# Supplementary material for: Chemical–Genetic Profiling of Imidazo[1,2-a]pyridines and -Pyrimidines Reveals Target Pathways Conserved between Yeast and Human Cells
Source: PLOS journal article supplement (doi:10.1371/journal.pgen.1000284), 2008-11-27
Supplement: S4 (10.1371/journal.pgen.1000284.s004) [file journal.pgen.1000284.s004]

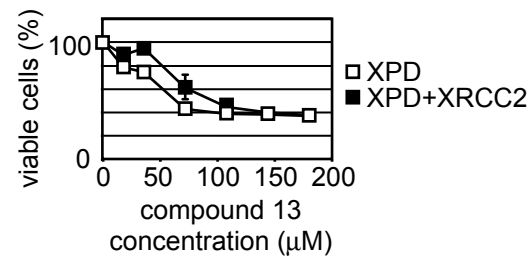

**Figure S4.** ERCC2 expression does not significantly rescue sensitivity of XPD cells to compound 13. Viability of XPD and rescued XPD (XPD+ERCC2) lines was determined following treatment with the indicated concentrations of compound 13.
